# Supplementary material for: Colibactin Contributes to the Hypervirulence of pks+ K1 CC23 Klebsiella pneumoniae in Mouse Meningitis Infections
Source: PubMed Central journal article supplement (PMC5374149; doi:10.3389/fcimb.2017.00103), 2017-03-31
Supplement: Presentation1.pdf [file Presentation1.pdf]

## 1 **Supplementary results**

2

### 3 **Examination of intestinal mucosa in response to orogastric inoculation of *K.***

4 ***pneumoniae* 1084S and  $\Delta$ ClbA.** Intestinal colonization is a prerequisite for *K.*

5 *pneumoniae* to develop systemic infections (Tu et al., 2009;Fung et al., 2012).

6 Through the orogastric route, *K. pneumoniae* 1084S established its population in the  
7 small intestinal mucosa during the seven days post-inoculation, whereas  $\Delta$ ClbA could  
8 not be maintained, with decreasing loads from the 5<sup>th</sup> day (Fig. 3). To examine

9 whether the production of colibactin by *K. pneumoniae* 1084S induced tissue damages

10 to assist the translocation across an intestinal barrier, we collected the whole small

11 intestines from the mice which were orogastrically inoculated with  $1 \times 10^8$  CFU of

12 1084S or  $\Delta$ ClbA at the 3<sup>rd</sup> day post-inoculation. Histological examination of the

13 hematoxylin and eosin (H/E) stained sections revealed no significant mucosal

14 damages in the 1084S-infected intestines when compared to the control and that of

15  $\Delta$ ClbA group (Fig. S1). However, the largest area of the small intestines retrieved

16 from the 1084S group was found to have averagely enlarged submucosal space with

17 slight hyperemia (Fig. S1E) as compared to the  $\Delta$ ClbA group (Fig. S1F). The size of

18 Peyer's patches in the 1084S group (Fig S1H) was comparable to that in the  $\Delta$ ClbA

19 group (Fig. S1I). However, comparative RNA-seq analyses of the mucosa revealed

20 that the production of colibactin by *K. pneumoniae* 1084 promoted intestinal

21 inflammation, which might consequently assist bacterial translocation. Briefly,

22 intestinal mucosa was collected from *K. pneumoniae* 1084S- and  $\Delta$ ClbA-inoculated

23 mice at the day 3 for comparative RNA-Seq analyses (Fig. S2A). Clean reads were

24 obtained from the raw reads by removing the adaptor sequences, reads with >5%

25 ambiguous bases, and low-quality reads. The clean reads were then aligned to the

26 mouse genome. The differently expressed genes were screened out using the

27 following criteria: 1) fold change (FC) >2 for up- or downregulation and 2) false

28 discovery rate (FDR) <0.05. Genes with FC >2 for both up- or downregulation and

29 FDR <0.05 were identified as significantly differently expressed. Compared to the

30 intestinal mucosa infected with  $\Delta$ ClbA, a total of 526 LncRNAs displayed differential

31 expression in the colibactin-producing *K. pneumoniae* infected mucosa tissue,

32 including 384 upregulated LncRNAs and 142 downregulated LncRNAs. To elucidate

33 the biological implication of unique genes with a role in response to *K. pneumoniae*

34 1084S colonization, we included all differently expressed mRNAs for GO (Gene

35 ontology) analysis (Fig. S2B). In the GO biological process analysis, the most

36 enriched was "extracellular region". The majority of genes were related to the

37 extracellular region in the cellular component analysis and calcium ion binding in the

38 molecular function. In the KEGG (Kyoto Encyclopedia of Genes and Genomes

1 database) pathway analysis, the dysregulated mRNAs were found to be enriched in 28  
2 pathways (Fig. S2C). Fold of activation of genes categorized in the chemokine  
3 signaling pathway and leukocyte transendothelial migration is presented (Fig. S2D).  
4 CCL17, CCL8, and MMP9 were significantly upregulated ( $> 10 \text{ Log}_2$ ) in response to  
5 the colibactin-producing *K. pneumoniae*. The chemokine CCL17, expressed by  
6 conventional DCs, has been demonstrated to be required for induction of intestinal  
7 inflammation in mice and has an autocrine effect on DCs that promotes production of  
8 inflammatory cytokines and activation of Th1 and Th17 cells and reduces expansion  
9 of Treg cells (Heiseke et al., 2012). The chemokine CCL8, secreted by CD169 (+)  
10 macrophage in response to mucosal instability, has been demonstrated to serve as an  
11 alert signal for the collapse of mucosal barrier defense (Asano et al., 2015). In rat  
12 acute pancreatitis model, MMP9 derived from polymorphonuclear neutrophils has  
13 been demonstrated to cause intestinal barrier dysfunction and promote bacterial  
14 translocation (Mikami et al., 2009). Our preliminary result suggested that the  
15 production of colibactin might induce intestinal inflammation through a yet-unknown  
16 mechanism. The inflammatory status in the intestinal mucosa may facilitate tight  
17 junction disruption, intestinal permeability, and transendothelial migration of  
18 leukocytes and that provides *K. pneumoniae* a portal of entry into extraintestinal  
19 tissues.

20

21 **Generation of the *clbP* deletion mutant in *K. pneumoniae* 1084S.** A 1506-bp region  
22 spanning the coding sequence of *clbP* was deleted in *K. pneumoniae* 1084S by using  
23 an allelic exchange technique. In general, 1,200-bp DNA fragments flanking the  
24 region to be deleted were amplified with specific primer sets, p540  
25 (TCTAGATCATTGGTTCTGCAAACTGGT)/p541  
26 (GGTACCTATTGTCATCCTGTGAACACCT) and p542  
27 (GGTACCTGGGACGATGAGTAATATCAGT)/p543  
28 (GAGCTCTGAATCATAACGACCTCGGGT) and the amplified DNA fragments were  
29 cloned into pKAS46, a suicide vector containing *rpsL*, which allows positive selection  
30 for vector loss using streptomycin (Skorupski and Taylor, 1996). To facilitate the  
31 positive selection of deletion mutants, a chloramphenicol-resistant cassette which was  
32 amplified from pACYC184, cloned into the insert on pKAS46 to replace the deletion  
33 region. The resulting construct pYC519 in *E. coli* S17-1  $\lambda$  *pir* was subsequently  
34 mobilized to *K. pneumoniae* 1084S via conjugation. Kanamycin-resistant  
35 transconjugants were selected, propagated in LB, and then subjected to streptomycin  
36 selection (500  $\mu\text{g/ml}$ ). After the occurrence of double cross-over, colonies showing  
37 resistance to chloramphenicol and susceptibility to kanamycin were isolated. After  
38 PCR verification, the mutant with *clbP* deletion was named  $\Delta\text{ClbP}$ .

1

2 **Deletion of *clbP* attenuated *K. pneumoniae* 1084 virulence in mouse meningitis**

3 **model.** While the *clbA* gene encodes a phosphopantetheinyl transferase required for  
4 colibactin synthesis, the *clbP* gene encodes a D-amino peptidase involved in the  
5 maturation of colibactin. Precolibactin is transported into the periplasm and cleaved  
6 by ClbP to release the mature product (Dubois et al., 2011; Cougnoux et al., 2012).

7 The deletion of *clbP* has been demonstrated to abolish the production of the biological  
8 effect of colibactin in *E. coli* (McCarthy et al., 2015; Cougnoux et al., 2016; Trautman  
9 et al., 2017). To examine whether the defects of  $\Delta$ ClbA on the development of  
10 meningitis were attributed to the lack of colibactin, we determined the virulence of  
11  $\Delta$ ClbP in our meningitis mouse models. Through the orogastric route, 200  $\mu$ l of  
12 bacterial suspension containing  $1 \times 10^8$  CFU of  $\Delta$ ClbP were inoculated into six  
13 8-wk-old BALB/c male mice. At the 7<sup>th</sup> day post-inoculation, all of the mice were  
14 sacrificed. The mucosa of small and large intestines, liver, spleen, brain, and blood  
15 were retrieved, homogenized, and subjected to the enumeration of  $\Delta$ ClbP. Similar to  
16  $\Delta$ ClbA,  $\Delta$ ClbP was able to propagate in the intestinal lumen, as shown in  
17 supplementary Fig. 3A that the fecal shedding of  $\Delta$ ClbP was not significantly affected.  
18 However, when compared to 1084S, the loads of  $\Delta$ ClbP significantly decreased in the  
19 intestinal mucosa and in most of the extraintestinal organs, including the brain. The  
20 defect of  $\Delta$ ClbP on the invasion of the mucosal barrier was also noted in the intranasal  
21 model. At the 5<sup>th</sup> day post-intranasal-inoculation, the bacterial counts of  $\Delta$ ClbP in  
22 lungs, brain, spleen, and blood of the mice were significantly less than that of the  
23 1084S group (Fig. S3B). Besides,  $\Delta$ ClbP was hard to be detected in the blood, even  
24 via the intravenous inoculation route (Fig. S3C). The CFU of  $\Delta$ ClbP in the brain was  
25 significantly decreased at 24 hours post-intravenous-inoculation. Taken together, the  
26 deletion of *clbP* significantly attenuated *K. pneumoniae* 1084S virulence to get access  
27 to the brain in the three different meningitis mouse models.

28

29 **References**

30

- 31 Asano, K., Takahashi, N., Ushiki, M., Monya, M., Aihara, F., Kuboki, E., Moriyama,  
32 S., Iida, M., Kitamura, H., Qiu, C.H., Watanabe, T., and Tanaka, M. (2015).  
33 Intestinal CD169(+) macrophages initiate mucosal inflammation by secreting  
34 CCL8 that recruits inflammatory monocytes. *Nat Commun* 6, 7802.
- 35 Cougnoux, A., Delmas, J., Gibold, L., Fais, T., Romagnoli, C., Robin, F.,  
36 Cuevas-Ramos, G., Oswald, E., Darfeuille-Michaud, A., Prati, F., Dalmasso,  
37 G., and Bonnet, R. (2016). Small-molecule inhibitors prevent the genotoxic  
38 and protumoural effects induced by colibactin-producing bacteria. *Gut* 65,

1 278-285.

2 Cougnoux, A., Gibold, L., Robin, F., Dubois, D., Pradel, N., Darfeuille-Michaud, A.,  
3 Dalmasso, G., Delmas, J., and Bonnet, R. (2012). Analysis of  
4 structure-function relationships in the colibactin-maturing enzyme ClbP. *J*  
5 *Mol Biol* 424, 203-214.

6 Dubois, D., Baron, O., Cougnoux, A., Delmas, J., Pradel, N., Boury, M., Bouchon, B.,  
7 Bringer, M.A., Nougayrede, J.P., Oswald, E., and Bonnet, R. (2011). ClbP is a  
8 prototype of a peptidase subgroup involved in biosynthesis of nonribosomal  
9 peptides. *J Biol Chem* 286, 35562-35570.

10 Fung, C.P., Lin, Y.T., Lin, J.C., Chen, T.L., Yeh, K.M., Chang, F.Y., Chuang, H.C., Wu,  
11 H.S., Tseng, C.P., and Siu, L.K. (2012). *Klebsiella pneumoniae* in  
12 gastrointestinal tract and pyogenic liver abscess. *Emerg Infect Dis* 18,  
13 1322-1325.

14 Heiseke, A.F., Faul, A.C., Lehr, H.A., Forster, I., Schmid, R.M., Krug, A.B., and  
15 Reindl, W. (2012). CCL17 promotes intestinal inflammation in mice and  
16 counteracts regulatory T cell-mediated protection from colitis.  
17 *Gastroenterology* 142, 335-345.

18 Mccarthy, A.J., Martin, P., Cloup, E., Stabler, R.A., Oswald, E., and Taylor, P.W.  
19 (2015). The Genotoxin Colibactin Is a Determinant of Virulence in  
20 *Escherichia coli* K1 Experimental Neonatal Systemic Infection. *Infect Immun*  
21 83, 3704-3711.

22 Mikami, Y., Dobschutz, E.V., Sommer, O., Wellner, U., Unno, M., Hopt, U., and Keck,  
23 T. (2009). Matrix metalloproteinase-9 derived from polymorphonuclear  
24 neutrophils increases gut barrier dysfunction and bacterial translocation in rat  
25 severe acute pancreatitis. *Surgery* 145, 147-156.

26 Skorupski, K., and Taylor, R.K. (1996). Positive selection vectors for allelic exchange.  
27 *Gene* 169, 47-52.

28 Trautman, E., Healy, A.R., Shine, E., Herzon, S.B., and Crawford, J.M. (2017).  
29 Domain-targeted metabolomics delineates the heterocycle assembly steps of  
30 colibactin biosynthesis. *J Am Chem Soc.*

31 Tu, Y.C., Lu, M.C., Chiang, M.K., Huang, S.P., Peng, H.L., Chang, H.Y., Jan, M.S.,  
32 and Lai, Y.C. (2009). Genetic requirements for *Klebsiella pneumoniae*-induced  
33 liver abscess in an oral infection model. *Infect Immun* 77, 2657-2671.

34  
35

## 1 **Supplementary figure legends**

### 3 **Figure S1. Histological examination of intestinal mucosa in response to**

4 **orogastric inoculation of *K. pneumoniae*.** Eight-wk old BALB/c mice which were  
5 orogastrically inoculated with PBS as a control, with  $1 \times 10^8$  CFU of *K. pneumoniae*  
6 1084S or  $\Delta$ ClbA, were sacrificed at the 3<sup>rd</sup> day post-inoculation. Swiss rolls of the  
7 whole small intestines harvested from the control and infected mice were paraffin  
8 embedded. Representative images of hematoxylin and eosin (H/E) stained sections are  
9 presented. Scale bar in (A-C) is 2 mm; in (D-I) is 200  $\mu$ m.

### 11 **Figure S2. Host response induced upon the *in vivo* interaction between**

12 **colibactin-producing *K. pneumoniae* and intestinal mucosa.** (A) At the 3<sup>rd</sup> day  
13 post-orogastric inoculation with  $1 \times 10^8$  CFU of *K. pneumoniae* 1084S or  $\Delta$ ClbA, mice  
14 were sacrificed and intestinal mucosa were harvested for comparative RNA-Seq  
15 analyses. Compared to  $\Delta$ ClbA, a total of 526 LncRNAs displayed differential  
16 expression in 1084S-infected mucosa, including 384 upregulated LncRNAs and 142  
17 downregulated LncRNAs. (B) GO (Gene ontology) analysis and (C) KEGG (Kyoto  
18 Encyclopedia of Genes and Genomes database) pathway analysis of differently  
19 expressed LncRNAs. (D) Fold of activation ( $\text{Log}_2$ ) of genes with predicted function in  
20 chemokines signaling pathway and leukocyte transendothelial migration.

### 22 **Figure S3. Deletion of *clbP* significantly attenuated *K. pneumoniae* 1084S**

23 **virulence in mouse meningitis models.** The *clbP* deletion mutant,  $\Delta$ ClbP, was  
24 inoculated into five to six 8-wk-old BALB/c male mice through the orogastric,  
25 intranasal, and intravenous route at inoculums of  $1 \times 10^8$ ,  $1 \times 10^6$ , and  $1 \times 10^6$  CFU,  
26 respectively. All mice of the  $\Delta$ ClbP-inoculated survived the course of the experiment.  
27 (A) At the 7<sup>th</sup> day post-orogastric-inoculation, stool, intestinal mucosa, liver, spleen,  
28 brain, and blood of the  $\Delta$ ClbP-inoculated mice were retrieved for enumeration of CFU.  
29 (B) Bacterial loads in lungs, brain, spleen, and blood which were harvested from the  
30 mice intranasally inoculated with  $1 \times 10^6$  CFU of  $\Delta$ ClbP. (C) Bacterial loads in brain  
31 and blood retrieved at 24 hours post-intravenous-inoculation with  $1 \times 10^6$  CFU of  
32  $\Delta$ ClbP. CFU per gram of tissues of the  $\Delta$ ClbP group (slash) is plotted in comparison to  
33 that of the 1084S (dark gray) and  $\Delta$ ClbA (white) group and presented in box and  
34 whisker. The edges of each box are the 25th and 75th percentiles, and the middle is  
35 the median. An asterisk (\*) represents statistical significance of  $\text{CFUg}^{-1}$ ,  $p < 0.05$   
36 (one-tailed) determined by Mann-Whitney test, between 1084S and  $\Delta$ ClbP.

1 **Fig. S1**

2

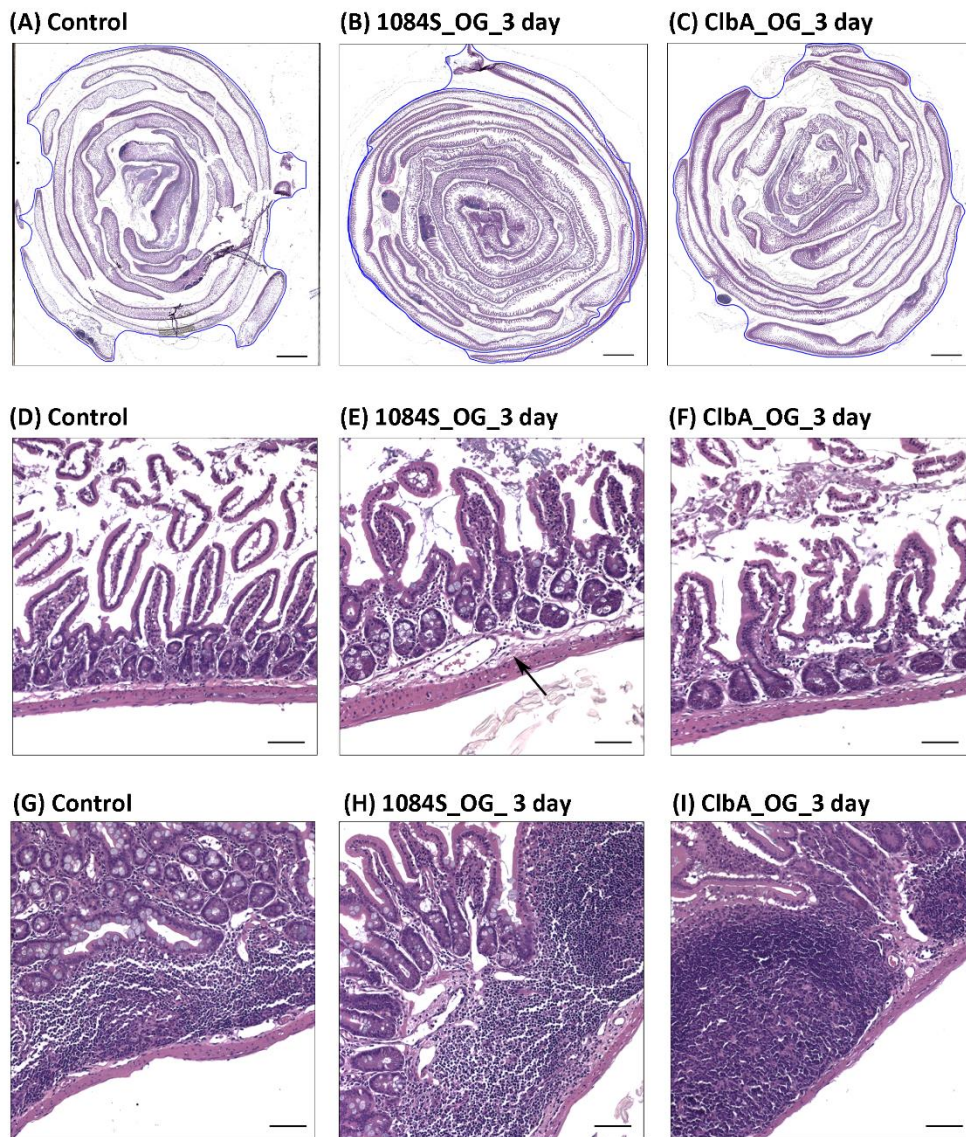

3

4

1 Fig. S2

2

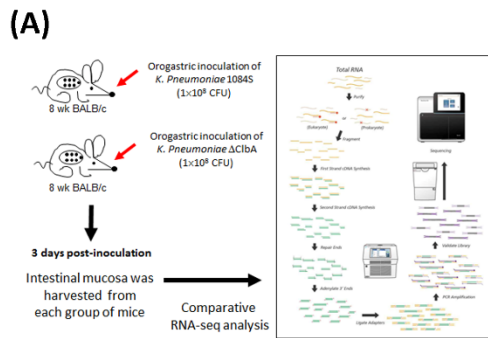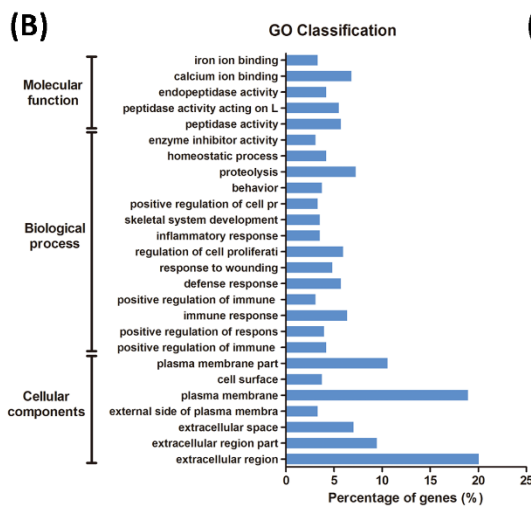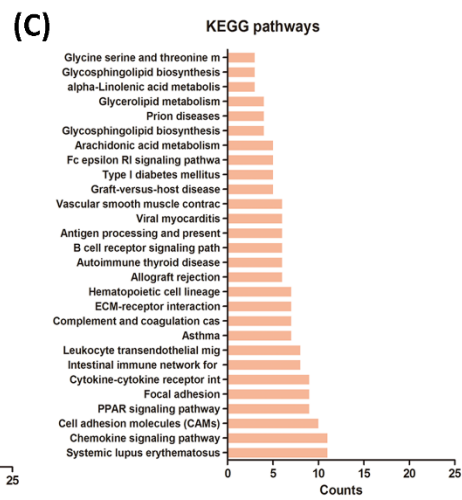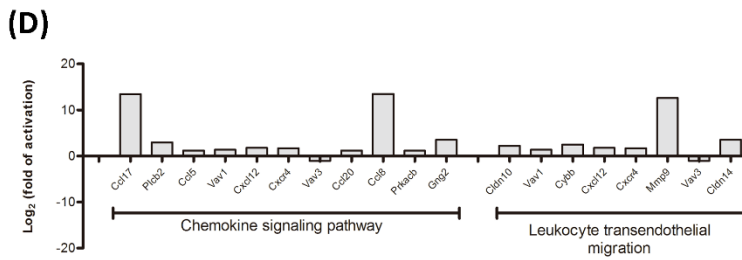

3

4

1 Fig. S3

2

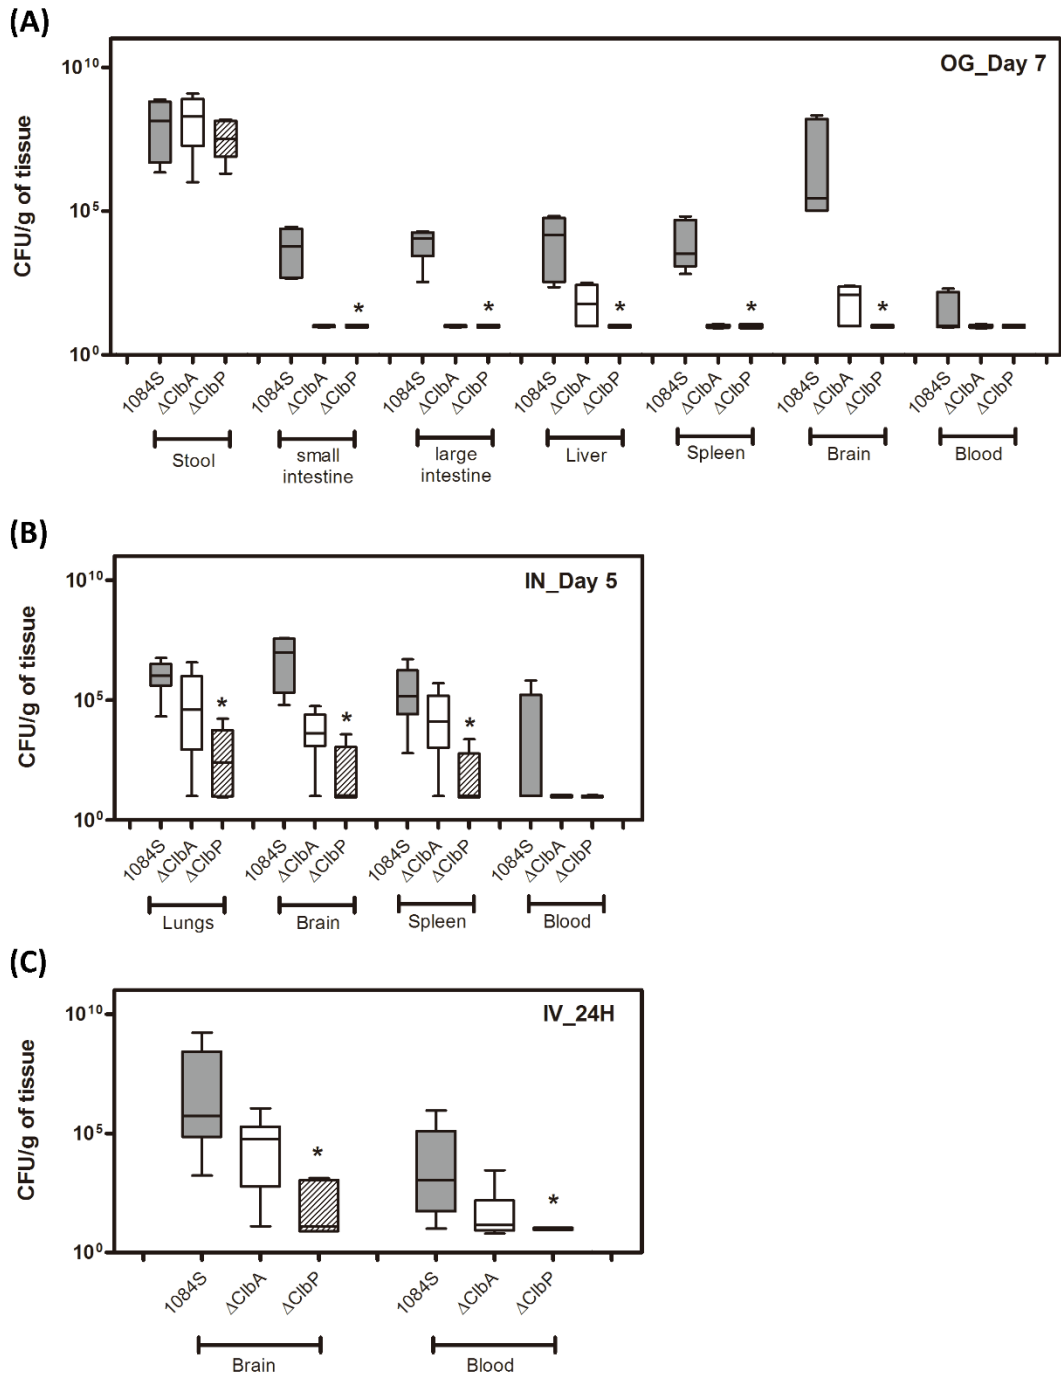

3
